# Supplementary material for: Interactional mechanisms of Paenibacillus polymyxa SC2 and pepper (Capsicum annuum L.) suggested by transcriptomics
Source: PubMed Central journal article supplement (PMC7931354; doi:10.1186/s12866-021-02132-2), 2021-03-04
Supplement: 12866_2021_2132_MOESM5_ESM.pdf [file 12866_2021_2132_MOESM5_ESM.pdf]

Color Key

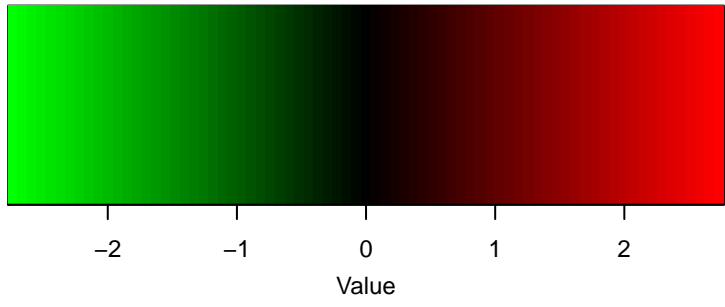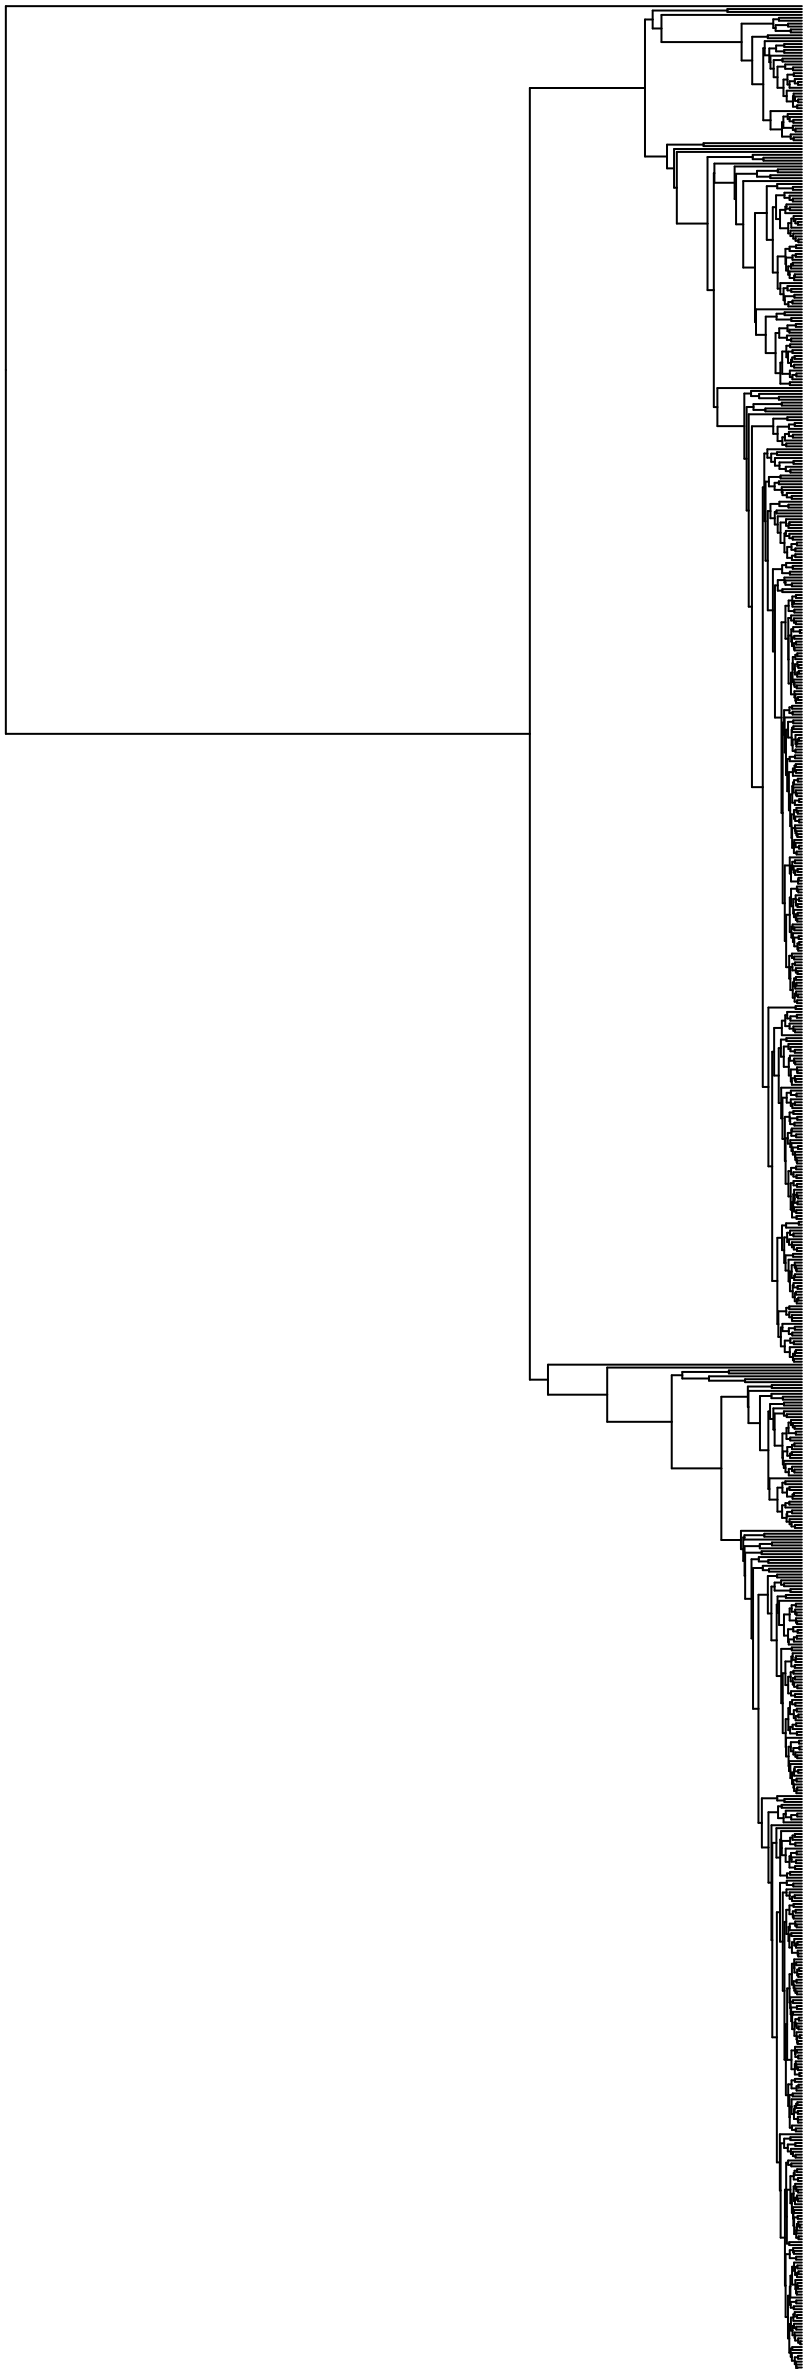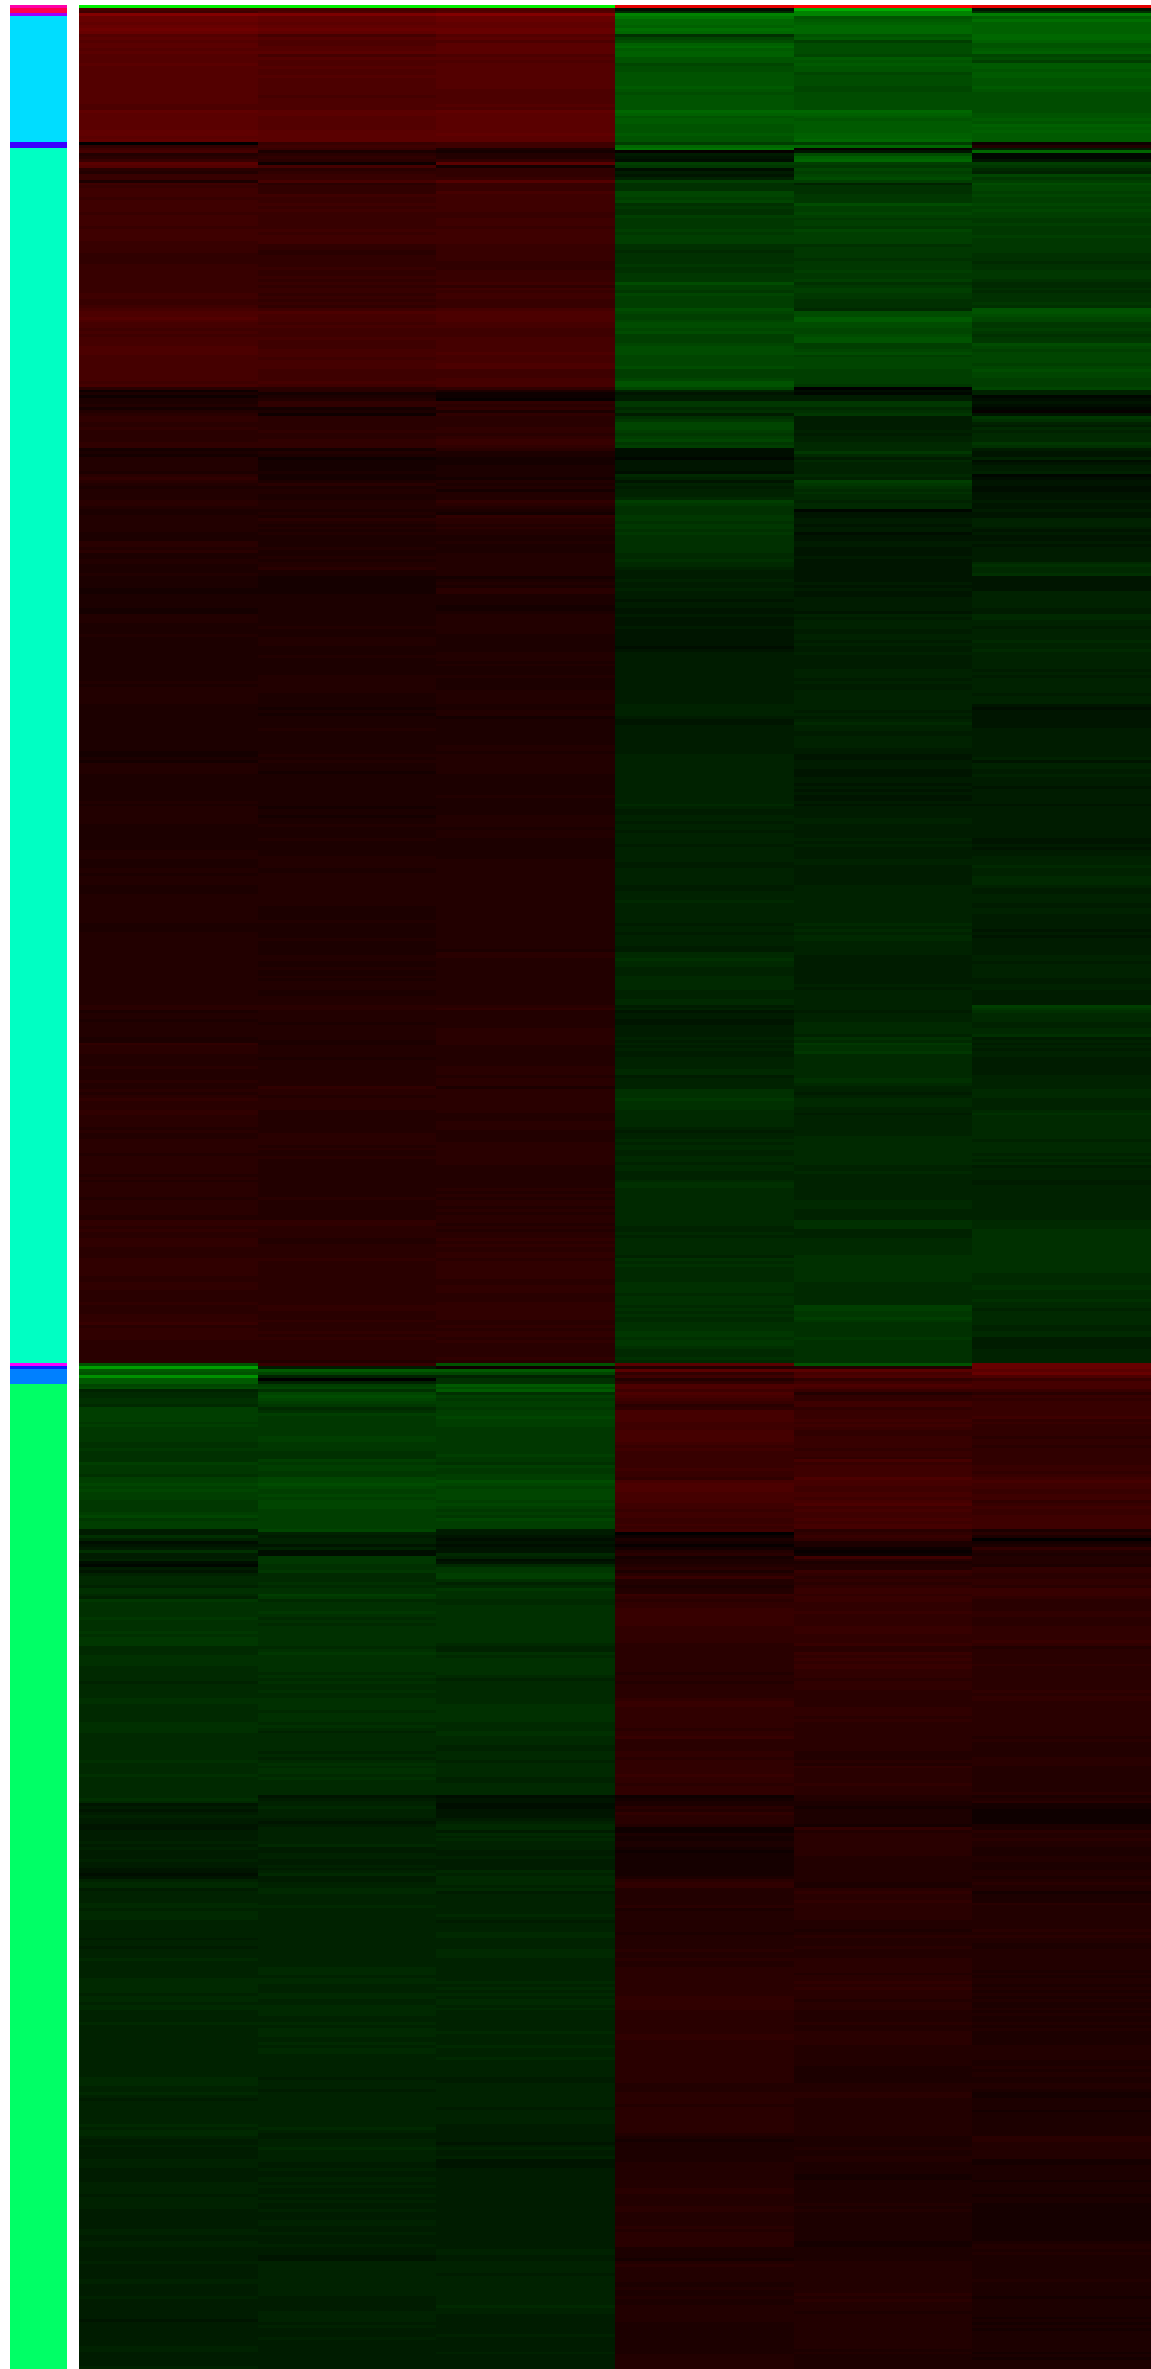

SH\_1

SH\_2

SH\_3

S\_2

S\_1

S\_3
